# Supplementary material
Source: publisher figshare collection journal article supplement (https://acs.figshare.com/ndownloader/files/34697887)
Supplement: Supplementary file 1 [file 34697887]

# Evaluating the effect of B-site cation doping on the properties of $\text{Pr}_{0.4}\text{Sr}_{0.5}\text{Fe}_{0.9}\text{Mo}_{0.1}\text{O}_3$ for reversible single-component cell

Ping Li<sup>1,2</sup>, Pu Yang<sup>2</sup>, Tianqi Shao<sup>2</sup>, Yinuo Han<sup>2</sup>, Runze Dong<sup>2</sup>, Fei Liu<sup>2</sup>, Fei Yan<sup>1,2\*</sup>,  
Tian Gan<sup>3</sup>, and Dong Fu<sup>1,2</sup>

<sup>1</sup> Hebei Key Lab of Power Plant Flue Gas Multi-Pollutants Control, Department of Environmental Science and Engineering, North China Electric Power University, Baoding 071003, PR China

<sup>2</sup> School of Environmental Science and Engineering, North China Electric Power University, Baoding 071003, PR China

<sup>3</sup> School of Chemistry and Life Science, Jiangsu Key Laboratory of Environmental Functional Materials, Suzhou University of Science and Technology, Suzhou 215009, PR China

---

\* Corresponding author. Email: yanfeican@tju.edu.cn; Fei Yan)

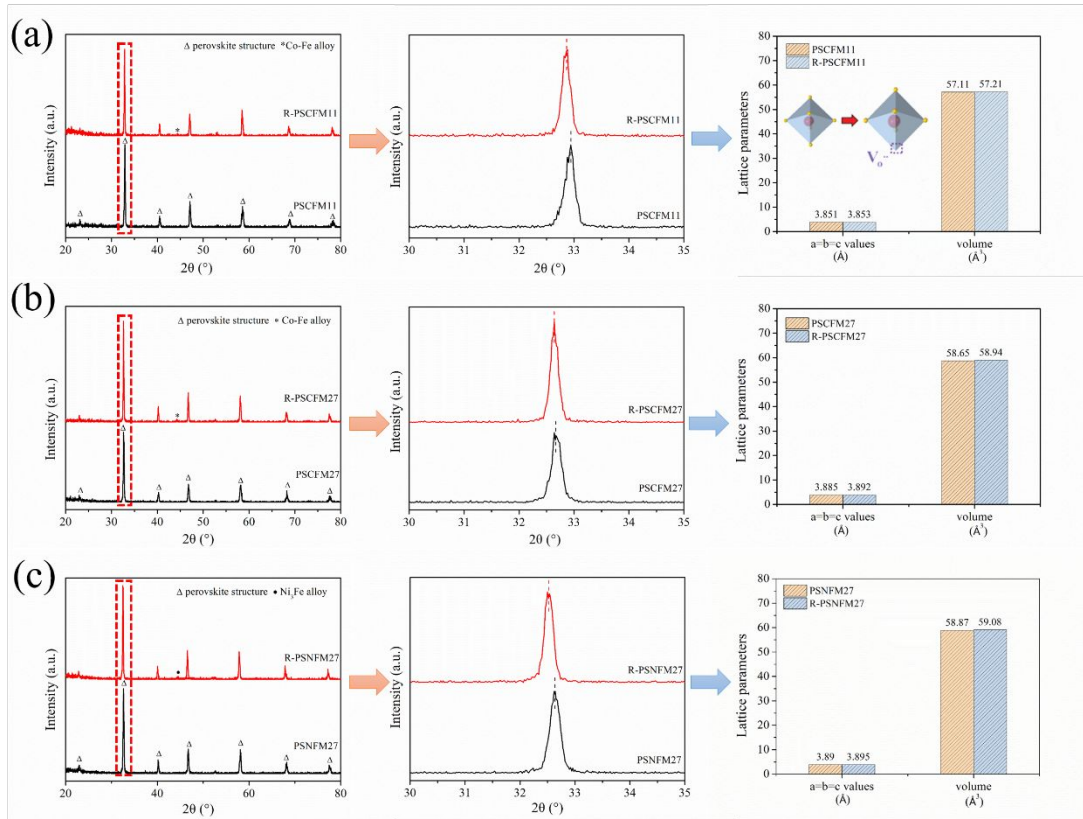

**Figure S1.** XRD patterns and the corresponding lattice parameters of (a) PSCFM11 and R-PSCFM11, (b) PSCFM27 and R-PSCFM27, and (c) PSNFM27 and R-PSNFM27

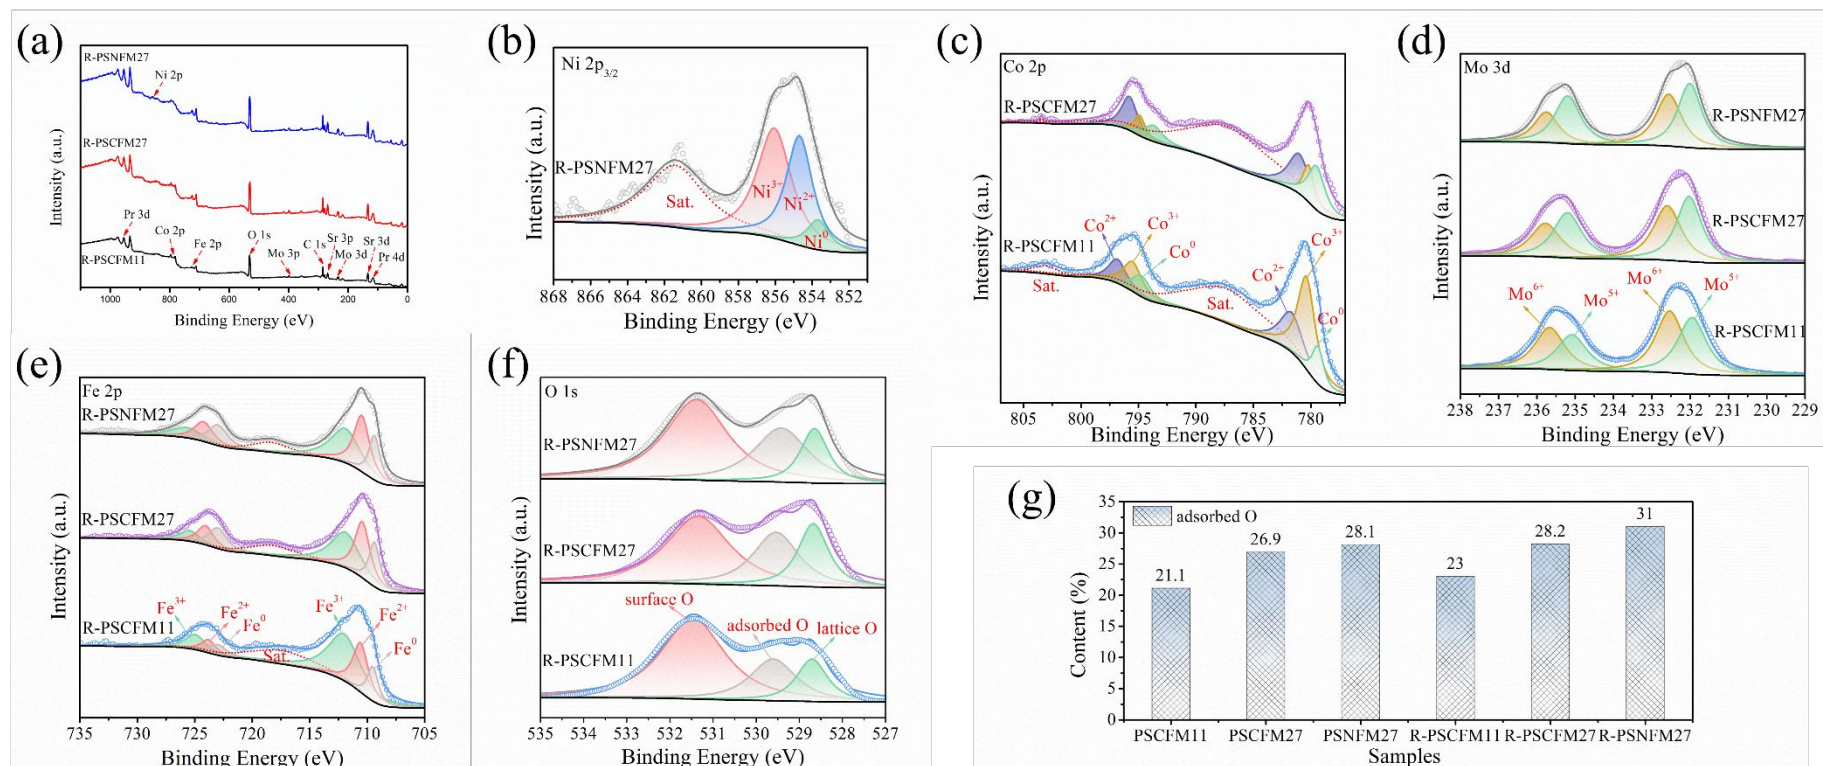

**Figure S2.** XPS spectra of (a) full spectra, (b) Ni 2p<sub>3/2</sub>, (c) Co 2p, (d) Mo 3d, (e) Fe 2p, (f) O 1s of R-PSCFM11, R-PSCFM27 and R-PSNFM27, and (g) adsorbed oxygen content of various sample powders.

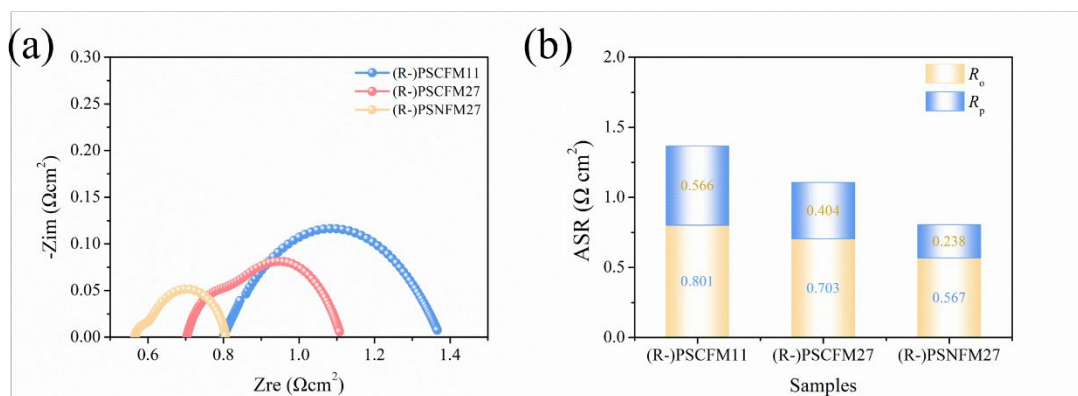

**Figure S3.** (a) Nyquist plot and (b) the corresponding ASR values of the SCFCs composed of (R-)PSCFM11, (R-)PSCFM27, and (R-)PSNFM27 oxides at 700 °C. (hydrogen side:  $\text{H}_2$ ; oxygen side:  $\text{O}_2$ )

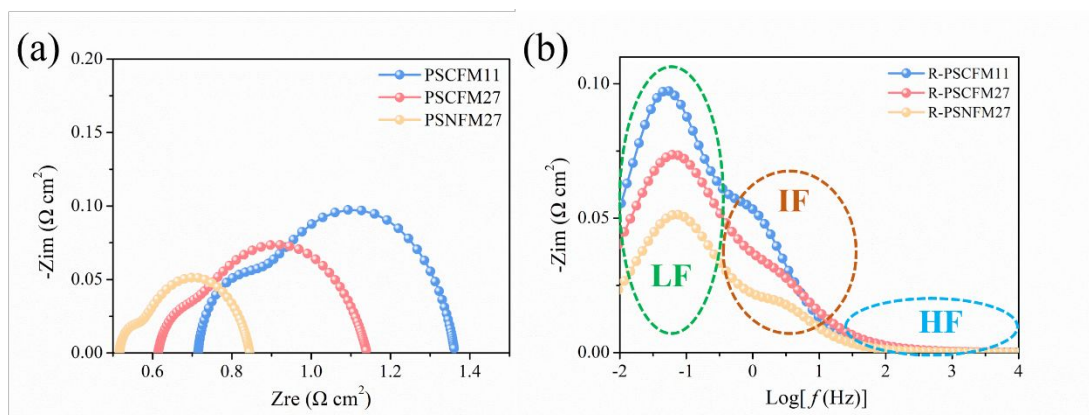

**Figure S4.** (a) Nyquist plots and (b) Bode plots of the SCFCs composed of R-PSCFM11, R-PSCFM27, and R-PSNFM27 oxides at 700 °C in  $\text{H}_2$  atmosphere.

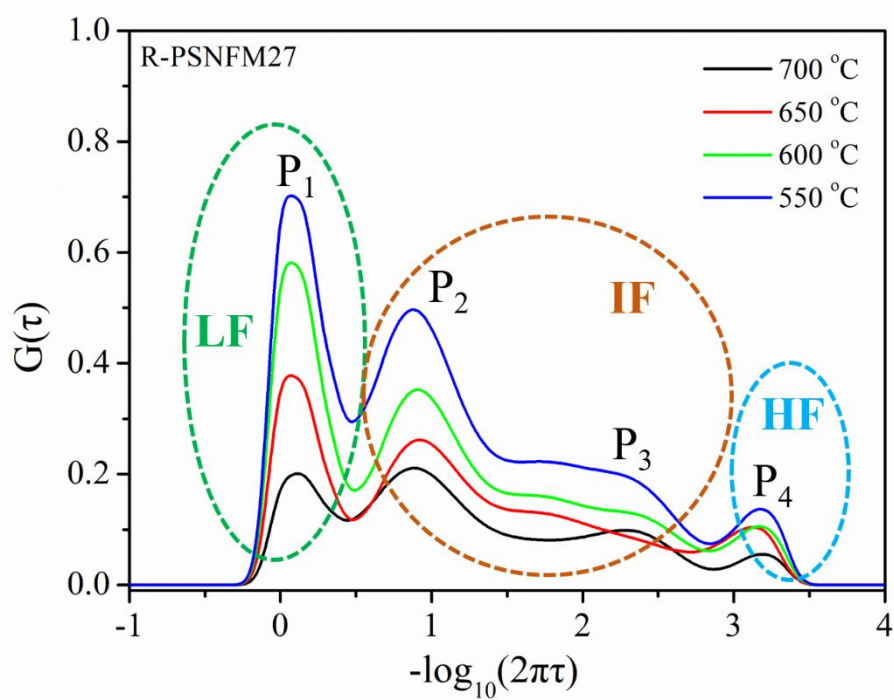

**Figure S5.** DRT spectra of the SCFC composed of R-PSNFM27 at various temperatures in  $H_2$  atmosphere.

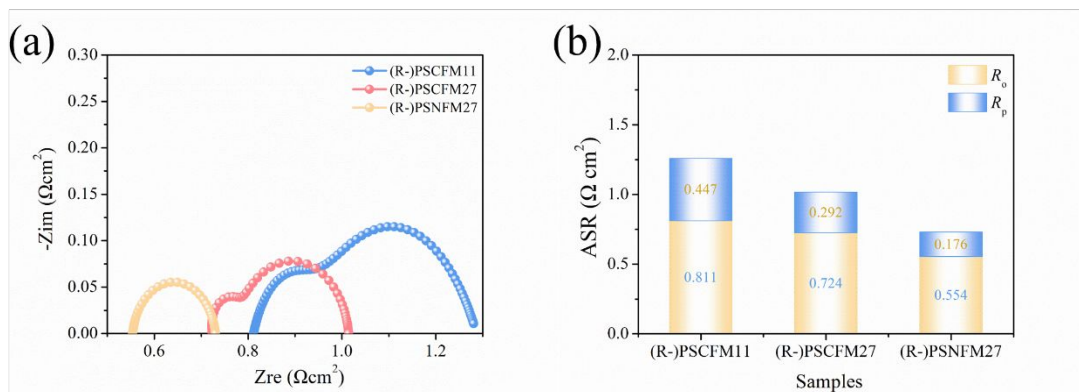

**Figure S6.** (a) Nyquist plot and (b) the corresponding ASR values of the cells composed of (R-)PSCFM11, (R-)PSCFM27, and (R-)PSNFM27 oxides at 700 °C in SOEC mode at a voltage of 1.3 V. (hydrogen side: 70% $\text{H}_2$ -30% $\text{H}_2\text{O}$ ; oxygen side:  $\text{O}_2$ )



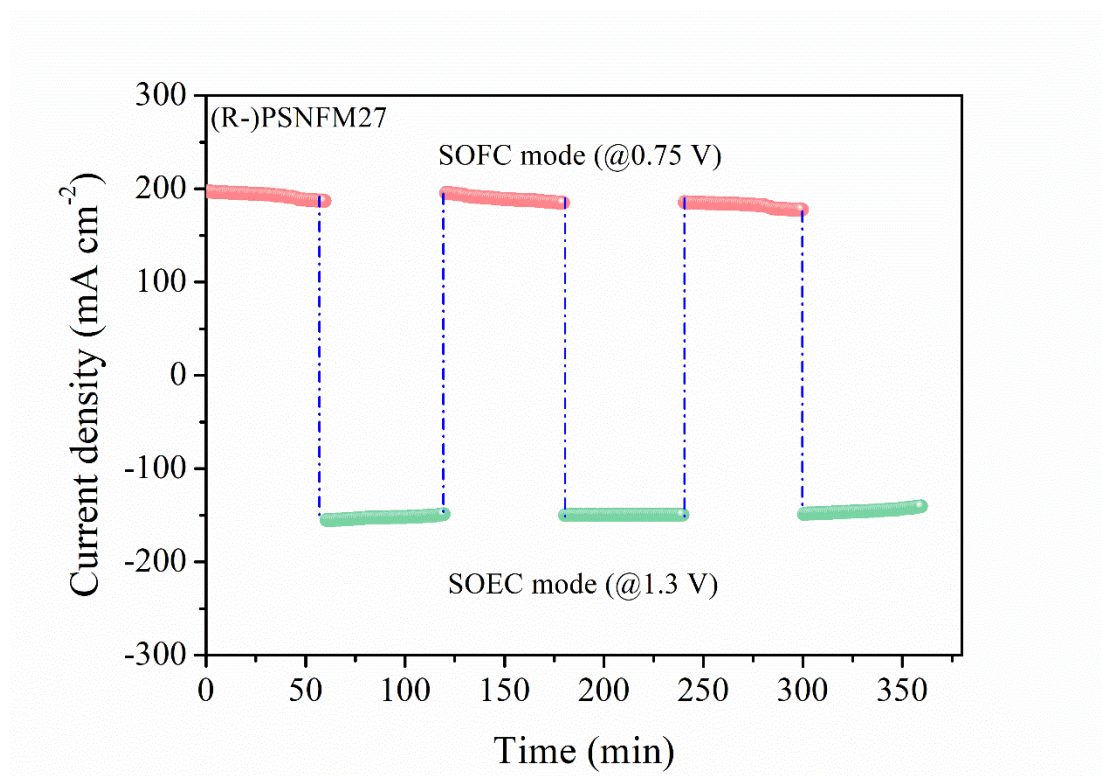

**Figure S7.** Short-term interval reversibility of the RSCCs composed of (R-)PSNFM27 in two modes (SOFC and SOEC) at 600 °C.



**Table S1** Elements content of R-PSCFM11, R-PSCFM27 and R-PSNFM27 (calculated from SEM-EDX)

| Samples   | Element content (Atomic) (%) |      |      |      |       |      |       |
|-----------|------------------------------|------|------|------|-------|------|-------|
|           | Pr                           | Sr   | Co   | Ni   | Fe    | Mo   | O     |
| R-PSCFM11 | 6.73                         | 7.96 | 7.35 |      | 8.42  | 2.68 | 66.87 |
| R-PSCFM27 | 7.63                         | 9.16 | 4.26 |      | 14.24 | 2.63 | 62.09 |
| R-PSNFM27 | 11.83                        | 9.9  |      | 6.77 | 22.59 | 3.26 | 45.64 |

**Table S2** Relative areas derived from curve deconvolutions of Fe 2p, Co 2p, Ni 2p and O 1s spectra for PSCFM11, PSCFM27 and PSNFM27

| samples | Relative area (%) |                  |                  |                  |                  |                  |                  |                  |           |            |           |
|---------|-------------------|------------------|------------------|------------------|------------------|------------------|------------------|------------------|-----------|------------|-----------|
|         | Fe <sup>2+</sup>  | Fe <sup>3+</sup> | Co <sup>2+</sup> | Co <sup>3+</sup> | Ni <sup>2+</sup> | Ni <sup>3+</sup> | Mo <sup>5+</sup> | Mo <sup>6+</sup> | surface O | adsorbed O | lattice O |
| PSCFM11 | 39.1              | 60.9             | 39.5             | 60.5             | /                | /                | 44.0             | 56.0             | 56.5      | 21.1       | 22.4      |
| PSCFM27 | 50.2              | 49.8             | 64.5             | 35.5             | /                | /                | 47.3             | 52.7             | 49.9      | 26.9       | 23.2      |
| PSNFM27 | 57.3              | 42.7             | /                | /                | 44.5             | 55.5             | 53.2             | 46.8             | 51.0      | 28.1       | 20.9      |

**Table S3** Relative areas derived from curve deconvolutions of Fe 2p, Co 2p, Ni 2p and O 1s spectra for R-PSCFM11, R-PSCFM27 and R-PSNFM27

| samples   | Relative area (%) |                  |                  |                 |                  |                  |                 |                  |                  |                  |                  |           |            |           |
|-----------|-------------------|------------------|------------------|-----------------|------------------|------------------|-----------------|------------------|------------------|------------------|------------------|-----------|------------|-----------|
|           | Fe <sup>0</sup>   | Fe <sup>2+</sup> | Fe <sup>3+</sup> | Co <sup>0</sup> | Co <sup>2+</sup> | Co <sup>3+</sup> | Ni <sup>0</sup> | Ni <sup>2+</sup> | Ni <sup>3+</sup> | Mo <sup>5+</sup> | Mo <sup>6+</sup> | surface O | adsorbed O | lattice O |
| R-PSCFM11 | 17.5              | 28.7             | 53.8             | 19.3            | 30.4             | 50.3             | /               | /                | /                | 46.9             | 53.1             | 61.2      | 23.0       | 15.8      |
| R-PSCFM27 | 26.4              | 36.0             | 37.6             | 34.3            | 44.6             | 21.1             | /               | /                | /                | 53.8             | 46.2             | 49.7      | 28.2       | 22.1      |
| R-PSNFM27 | 29.6              | 32.3             | 38.1             | /               | /                | /                | 9.3             | 39.5             | 51.2             | 57.3             | 42.7             | 53.0      | 31.0       | 16.0      |
